# Supplementary material for: Has the COVID-19 Pandemic Led to Changes in the Tasks of the Primary Care Workforce? An International Survey among General Practices in 38 Countries (PRICOV-19)
Source: MDPI journal article supplement (doi:10.3390/ijerph192215329), 2022-11-20
Supplement: s1 [file s1]

### Supplementary tables

Supplementary table S1: Scale on task changes: average, median and 25<sup>th</sup> and 75<sup>th</sup> percentile by country.

| Country                | Average | Median | P-25 | P-75 |
|------------------------|---------|--------|------|------|
| Austria                | 2,74    | 2,81   | 2,55 | 3,02 |
| Belgium                | 2,75    | 2,77   | 2,43 | 3,09 |
| Bosnia and Herzegovina | 2,15    | 1,96   | 1,72 | 2,72 |
| Bulgaria               | 2,95    | 2,97   | 2,73 | 3,19 |
| Croatia                | 2,92    | 2,99   | 2,73 | 3,40 |
| Czech Republic         | 2,95    | 3,00   | 2,80 | 3,26 |
| Cyprus                 | 3,05    | 3,11   | 2,79 | 3,33 |
| Denmark                | 2,94    | 2,87   | 2,60 | 3,29 |
| Estonia                | 2,97    | 2,99   | 2,75 | 3,26 |
| Finland                | 2,00    | 2,00   | 1,74 | 2,26 |
| France                 | 2,58    | 2,67   | 2,25 | 3,02 |
| Germany                | 2,90    | 2,90   | 2,67 | 3,19 |
| Greece                 | 2,89    | 2,95   | 2,61 | 3,09 |
| Hungary                | 2,98    | 3,01   | 2,77 | 3,28 |
| Iceland                | 2,73    | 2,74   | 2,46 | 3,15 |
| Ireland                | 2,82    | 2,85   | 2,59 | 3,08 |
| Israel                 | 2,26    | 2,22   | 1,91 | 2,70 |
| Italy                  | 3,46    | 3,50   | 3,24 | 3,76 |
| Kosovo*                | 3,03    | 3,08   | 2,73 | 3,43 |
| Latvia                 | 3,40    | 3,66   | 3,34 | 3,80 |
| Lithuania              | 3,22    | 3,32   | 2,90 | 3,55 |
| Luxembourg             | 2,69    | 2,79   | 2,29 | 3,25 |
| Malta                  | 2,30    | 2,55   | 1,90 | 2,69 |
| Moldavia               | 3,28    | 3,22   | 3,04 | 3,64 |
| The Netherlands        | 2,75    | 2,82   | 2,43 | 3,17 |
| North Macedonia        | 2,59    | 2,85   | 2,38 | 2,89 |
| Norway                 | 2,67    | 2,72   | 2,38 | 2,94 |
| Poland                 | 3,08    | 3,09   | 2,86 | 3,50 |
| Portugal               | 3,11    | 3,10   | 2,83 | 3,51 |
| Romania                | 3,34    | 3,47   | 3,05 | 3,83 |
| Serbia                 | 2,40    | 2,67   | 1,93 | 2,90 |
| Slovenia               | 2,75    | 2,79   | 2,48 | 3,08 |
| Spain                  | 2,76    | 2,82   | 2,44 | 3,11 |
| Sweden                 | 2,83    | 2,90   | 2,56 | 3,12 |
| Switzerland            | 2,87    | 2,85   | 2,65 | 3,25 |
| Turkey                 | 2,51    | 2,62   | 2,09 | 3,03 |
| Ukraine                | 2,79    | 2,93   | 2,53 | 3,03 |
| The United Kingdom     | 2,71    | 2,72   | 2,39 | 3,00 |

Supplementary table S2: Number of patients, number of GPs and GP trainees, and total number of paid staff by country (average and median)

| Country                | Practice size (patients) |        | Number of GPs and trainees |        | Total number of staff |        |           |
|------------------------|--------------------------|--------|----------------------------|--------|-----------------------|--------|-----------|
|                        | Average                  | Median | Average                    | Median | Average               | Median | N between |
| Austria                | 2,468                    | 1,600  | 1.8                        | 1      | 7.0                   | 5      | 137-140   |
| Belgium                | 3,118                    | 2,500  | 2.6                        | 2      | 5.5                   | 3.0    | 286-478   |
| Bosnia and Herzegovina | 6,976                    | 5,000  | 3.0                        | 3      | 7.8                   | 6      | 38-40     |
| Bulgaria               | 2,314                    | 1,745  | 11.3                       | 1      | 3.2                   | 2      | 102       |
| Croatia                | 1,707                    | 1,742  | 1.1                        | 1      | 2.3                   | 2      | 147-149   |
| Czech Rep              | 2,050                    | 1,920  | 1.9                        | 1      | 3.7                   | 3      | 110-111   |
| Cyprus                 | 2,541                    | 2,463  | 1.9                        | 2.0    | 6.1                   | 4.0    | 11-13     |
| Denmark                | 4,418                    | 3,300  | 3.0                        | 3      | 7.8                   | 8      | 39        |
| Estonia                | 4,420                    | 2,441  | 3.2                        | 2      | 10.3                  | 7      | 117-118   |
| Finland                | 3,601                    | 1,500  | 8.1                        | 5      | 57.2                  | 40     | 97-115    |
| France                 | 4,149                    | 2,650  | 5.5                        | 3      | 8.7                   | 5      | 614-641   |
| Germany                | 5,452                    | 3,000  | 2.6                        | 2      | 10.4                  | 8.5    | 246-262   |
| Greece                 | 24,406                   | 15,000 | 7.7                        | 6      | 27.2                  | 25     | 85-94     |
| Hungary                | 1,855                    | 1,750  | 1.2                        | 1      | 2.7                   | 2      | 222-224   |
| Iceland                | 11,636                   | 12,900 | 6.7                        | 8      | 29.1                  | 30     | 30-31     |
| Ireland                | 6,022                    | 4,500  | 3.7                        | 3      | 10.6                  | 9      | 182-185   |
| Israel                 | 4,014                    | 3,200  | 3.2                        | 3      | 16.1                  | 12     | 87-88     |
| Italy                  | 3,952                    | 3,001  | 2.8                        | 2      | 4.0                   | 3      | 206-207   |
| Kosovo*                | 22,354                   | 12,000 | 8.5                        | 5.5    | 81.3                  | 50     | 47-74     |
| Latvia                 | 1,951                    | 1,850  | 1.1                        | 1      | 3.8                   | 3      | 148-149   |
| Lithuania              | 13,653                   | 9,100  | 10.5                       | 7.5    | 134.5                 | 40     | 50-53     |
| Luxemburg              | 6,480                    | 3,000  | 3.6                        | 3.0    | 7.2                   | 5.0    | 17-20     |
| Malta                  | 17,667                   | 3,500  | 9.5                        | 1      | 12.1                  | 5      | 11-13     |
| Moldova                | 19,140                   | 8,048  | 13.8                       | 4      | 87.3                  | 29     | 72        |
| Netherlands            | 4,436                    | 3,200  | 3.4                        | 2      | 11.9                  | 10     | 165-166   |
| North Macedonia        | 2,478                    | 2,132  | 1.6                        | 1.0    | 3.9                   | 3.0    | 46        |
| Norway                 | 4,908                    | 4,500  | 5.3                        | 5      | 10.5                  | 10     | 144       |
| Poland                 | 6,141                    | 4,525  | 3.5                        | 3      | 12.5                  | 10     | 206-211   |
| Portugal               | 12,816                   | 12,000 | 7.7                        | 7      | 24.8                  | 23     | 222-225   |
| Romania                | 2,037                    | 1,918  | 1.4                        | 1      | 2.9                   | 3      | 99-101    |
| Serbia                 | 25,830                   | 10,000 | 14.4                       | 10     | 44.2                  | 25.5   | 102-113   |
| Slovenia               | 1,762                    | 1,800  | 1.3                        | 1      | 3.3                   | 3      | 189-192   |
| Spain                  | 17,531                   | 17,000 | 12.7                       | 12     | 42.0                  | 39     | 299-301   |
| Sweden                 | 11,057                   | 10,100 | 6.0                        | 5      | 45.8                  | 40     | 84-86     |
| Switzerland            | 5,958                    | 4,000  | 3.1                        | 2      | 11.3                  | 8      | 83-89     |
| Turkey                 | 13,081                   | 10,750 | 4.3                        | 4      | 10.3                  | 9      | 142-144   |
| Ukraine                | 21,248                   | 13,000 | 10.5                       | 6.0    | 59.0                  | 25.0   | 244-256   |
| United Kingdom         | 7,804                    | 7,450  | 6.1                        | 6.0    | 24.7                  | 25.0   | 23-24     |

Supplementary table S3: Country and health system characteristics \*

| Country                   | COVID-19<br>Confirmed<br>cases 1 <sup>st</sup><br>wave | Urgency<br>Deaths<br>1 <sup>st</sup> wave | Per million<br>Confirmed<br>cases 3<br>months<br>before<br>survey | inhabitants<br>Deaths 3<br>months<br>before<br>survey | Role<br>of GPs | task<br>shifting<br>around<br>2011 | Strength<br>of PC | Nurse<br>prescrip<br>tion<br>rights |
|---------------------------|--------------------------------------------------------|-------------------------------------------|-------------------------------------------------------------------|-------------------------------------------------------|----------------|------------------------------------|-------------------|-------------------------------------|
| Austria                   | 1781                                                   | 69                                        | 33,674                                                            | 729                                                   | 5              | 0.95                               | 2.24              | N                                   |
| Belgium                   | 4,698                                                  | 770                                       | 42,284                                                            | 580                                                   | 7              | 0.44                               | 2.23              | N                                   |
| Bosnia and<br>Herzegovina | 685                                                    | 39                                        | 20,735                                                            | 632                                                   | 4              | -                                  | -                 |                                     |
| Bulgaria                  | 310                                                    | 15                                        | 23,878                                                            | 1,123                                                 | 6              | 1.78                               | 2.14              | N                                   |
| Croatia                   | 544                                                    | 23                                        | 27,349                                                            | 898                                                   | 7              | -                                  | -                 |                                     |
| Cyprus                    | 1,012                                                  | 19                                        | 27,199                                                            | 204                                                   | 3              | 2.29                               | 1.97              | Y                                   |
| Czech Rep                 | 784                                                    | 28                                        | 46,452                                                            | 734                                                   | 6              | 2.28                               | 2.16              | N                                   |
| Denmark                   | 1,856                                                  | 92                                        | 22,233                                                            | 261                                                   | 3              | 3.45                               | 2.39              | Y                                   |
| Estonia                   | 1,333                                                  | 48                                        | 7,480                                                             | 41                                                    | 6              | 3.79                               | 2.30              | Y                                   |
| Finland                   | 1,122                                                  | 53                                        | 3,023                                                             | 11                                                    | 7              | 3.70                               | 2.31              | Y                                   |
| France                    | 2,686                                                  | 408                                       | 22,642                                                            | 488                                                   | 7              | -                                  | 2.17              | Y                                   |
| Germany                   | 2,089                                                  | 94                                        | 20,039                                                            | 556                                                   | 4              | 2.56                               | 2.22              | N                                   |
| Greece                    | 271                                                    | 15                                        | 11,568                                                            | 429                                                   | 6              | 1.50                               | 2.12              | N                                   |
| Hungary                   | 355                                                    | 46                                        | 42,623                                                            | 1,553                                                 | 7              | 3.15                               | 2.10              | N                                   |
| Iceland                   | 4,886                                                  | 27                                        | 3,015                                                             | 46                                                    | 5              | 2.72                               | 1.84              | N                                   |
| Ireland                   | 4,808                                                  | 305                                       | 27,001                                                            | 279                                                   | 4              | 3.39                               | 2.18              | Y                                   |
| Israel                    | 1,788                                                  | 29                                        | 23,467                                                            | 205                                                   | 2              | -                                  | -                 |                                     |
| Italy                     | 3,709                                                  | 524                                       | 29,648                                                            | 633                                                   | 4              | 0.62                               | 2.34              | N                                   |
| Kosovo*                   | 530                                                    | 16                                        | 19,909                                                            | 396                                                   | 5              | -                                  | -                 |                                     |
| Latvia                    | 520                                                    | 10                                        | 20,909                                                            | 320                                                   | 6              | 3.49                               | 2.17              | N                                   |
| Lithuania                 | 565                                                    | 15                                        | 62,027                                                            | 986                                                   | 5              | 3.27                               | 2.28              | N                                   |
| Luxemburg                 | 6,180                                                  | 164                                       | 11,537                                                            | 27                                                    | 6              | 0.19                               | 1.94              | N                                   |
| Malta                     | 1,031                                                  | 12                                        | 22,711                                                            | 393                                                   | 4              | 1.71                               | 2.14              | N                                   |
| Moldova                   | 1428                                                   | 50                                        | 20,681                                                            | 407                                                   | 7              | -                                  | -                 |                                     |
| Netherlands               | 2,548                                                  | 329                                       | 36,082                                                            | 383                                                   | 2              | 3.69                               | 2.49              | Y                                   |
| North<br>Macedonia        | 835                                                    | 47                                        | 28,624                                                            | 955                                                   | -              | 2.70                               | 2.24              | N                                   |
| Norway                    | 1504                                                   | 42                                        | 6,297                                                             | 53                                                    | 7              | 2.52                               | 2.27              | Y                                   |
| Poland                    | 477                                                    | 24                                        | 26,879                                                            | 637                                                   | 3.5            | 2.96                               | 2.14              | Y                                   |
| Portugal                  | 2,811                                                  | 117                                       | 33,171                                                            | 485                                                   | 7              | 3.72                               | 2.41              | N                                   |
| Romania                   | 859                                                    | 56                                        | 20,220                                                            | 400                                                   | 7              | 2.89                               | 2.31              | N                                   |
| Serbia                    | 1,519                                                  | 33                                        | 50,478                                                            | 465                                                   | 7              | -                                  | -                 | N                                   |
| Slovenia                  | 705                                                    | 50                                        | 35,065                                                            | 626                                                   | 5              | 2.74                               | 2.37              | N                                   |
| Spain                     | 4,924                                                  | 587                                       | 33,318                                                            | 480                                                   | 7              | 3.76                               | 2.43              | Y                                   |
| Sweden                    | 2,963                                                  | 359                                       | 39,030                                                            | 605                                                   | 5              | 3.96                               | 2.25              | Y                                   |
| Switzerland               | 3,501                                                  | 203                                       | 25,708                                                            | 557                                                   | 4              | 1.47                               | 2.05              | Y                                   |

|                |       |     |        |     |   |      |      |   |
|----------------|-------|-----|--------|-----|---|------|------|---|
| Turkey         | 1,722 | 48  | 23,901 | 172 | 4 | 2.88 | 2.28 | N |
| Ukraine        | 399   | 11  | 14,452 | 346 | - | -    | -    |   |
| United Kingdom | 3,322 | 489 | 8,521  | 307 | 3 | 3.95 | 2.51 | Y |

\* Source and definition of these variables are in the Methods section under 'measurements'.

Supplementary table S4: Multilevel analysis task changes in GPs, trainees and practice staff; sensitivity analysis with only full data

|                                                  | Model 1:<br>empty model<br>Coefficient (SE) | Model 2: practice<br>variables<br>Coefficient (SE) | Model 3:<br>interaction terms<br>Coefficient (SE) | Model 4:<br>Country variables <sup>a</sup><br>Coefficient (SE) |
|--------------------------------------------------|---------------------------------------------|----------------------------------------------------|---------------------------------------------------|----------------------------------------------------------------|
| <i>Fixed part</i>                                |                                             |                                                    |                                                   |                                                                |
| Constant                                         | 2.824<br>(0.057)                            | 2.505 (0.076)                                      | 2.517 (0.076)                                     |                                                                |
| Staff absence                                    |                                             | -0.0001 (0.0009)                                   | -0.004 (0.002)*                                   |                                                                |
| coped with internally                            |                                             | -0.004 (0.008)                                     | -0.013 (0.008)                                    |                                                                |
| coped with neighbouring practices                |                                             | -0.032 (0.010)*                                    | -0.029 (0.010)**                                  |                                                                |
| improved cooperation with neighbouring practices |                                             | 0.071 (0.010)**                                    | 0.072 (0.010)**                                   |                                                                |
| GPS happy with the task shifting                 |                                             | 0.060 (0.009)**                                    | 0.059 (0.009)**                                   |                                                                |
| GPs don't feel prepared                          |                                             | 0.016 (0.010)                                      | 0.016 (0.010)                                     |                                                                |
| need further training                            |                                             | 0.018 (0.010)                                      | 0.018 (0.010)                                     |                                                                |
| Practice size                                    |                                             | -4.277e-008<br>(1.34e-006)                         | -2.731e-008<br>(1.362e-006)                       |                                                                |
| Number of GPs and trainees                       |                                             | -0.0004 (0.0005)                                   | -0.0006 (0.0005)                                  |                                                                |
| Total number of paid staff                       |                                             | -4.792e-005<br>(0.003)                             | 0.001 (0.002)                                     |                                                                |
| Number of disciplines                            |                                             | 0.003 (0.005)                                      | 0.004 (0.005)                                     |                                                                |
| GPs paid (mixed) fee-for-service                 |                                             | -0.033 (0.032)                                     | -0.034 (0.032)                                    |                                                                |
| Practice location (ref. big city)                |                                             |                                                    |                                                   |                                                                |
| - suburbs                                        |                                             | -0.028 (0.034)                                     | -0.027 (0.034)                                    |                                                                |
| - (small) towns                                  |                                             | -0.024 (0.028)                                     | 0.027 (0.028)                                     |                                                                |
| - mixed urban-rural                              |                                             | 0.022 (0.027)                                      | 0.023 (0.027)                                     |                                                                |

|                                                                   |               |                |                  |                           |
|-------------------------------------------------------------------|---------------|----------------|------------------|---------------------------|
| - rural                                                           |               | -0.032 (0.029) | 0.032 (0.029)    |                           |
| Practice population elderly/chronic conditions                    |               | 0.022 (0.008)* | 0.021 (0.008)*   |                           |
| Practice population other vulnerable populations                  |               | 0.002 (0.004)  | 0.003 (0.004)    |                           |
| Interaction staff absence*coping internally                       |               |                | 0.002 (0.0006)** |                           |
| Interaction staff absence*coping neighbouring practices           |               |                | 0 (0)            |                           |
| Interaction staff absence*coping improved cooperation             |               |                | -0.001 (0.001)   |                           |
| COVID-19 cases per million population during 1 <sup>st</sup> wave |               |                |                  | 0.009 (0.005)<br>(p=0.09) |
| Idem COVID-19 mortality                                           |               |                |                  | -0.003 (0.005)            |
| COVID-19 cases per million population 3 mnths before survey       |               |                |                  | -0.0002 (0.005)           |
| Idem COVID-19 mortality                                           |               |                |                  | 0.006 (0.005)             |
| Role of GPs during pandemic                                       |               |                |                  | 0.034 (0.038)             |
| Strength of PC                                                    |               |                |                  | -0.073 (0.428)            |
| Nurse prescribing rights (yes)                                    |               |                |                  | -0.154 (0.128)            |
| Degree of task shifting in 2012                                   |               |                |                  | -0.025 (0.063)            |
| <i>Random part</i>                                                |               |                |                  |                           |
| Country variance                                                  | 0.11 (0.028)  | 0.12 (0.029)   | 0.12 (0.029)     |                           |
| Practice variance                                                 | 0.282 (0.007) | 0.27 (0.007)   | 0.27 (0.007)     |                           |
| ICC (%)                                                           | 28.5          | 29.9           | 29.9             |                           |

\* p<0.05

\*\* p<0.01

<sup>a</sup> Country variables have been added one by one; coefficients of practice level variables are not reported – they differ only marginally from those in Model 3.
